# Supplementary material for: Expression of the Reverse Transcriptase Domain of Telomerase Reverse Transcriptase Induces Lytic Cellular Response in DNA-Immunized Mice and Limits Tumorigenic and Metastatic Potential of Murine Adenocarcinoma 4T1 Cells
Source: PubMed Central journal article supplement (PMC7350266; doi:10.3390/vaccines8020318), 2020-06-18
Supplement: vaccines-08-00318-s001.pdf [file vaccines-08-00318-s001.pdf]

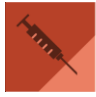

Supplementary materials

**Supplementary Figure S1.** Lentiviral vector pRRLSIN.cPPT.PGK used for transduction of 4T1luc2 cell line. Position of insertion of rtTERT gene marked in red. PGK-seq and LVT-200R (Supplementary Table 1) PCR primers were used to confirm the insertion of lentiviruses encoding rtTERT into genome of 4T1luc2 cells.

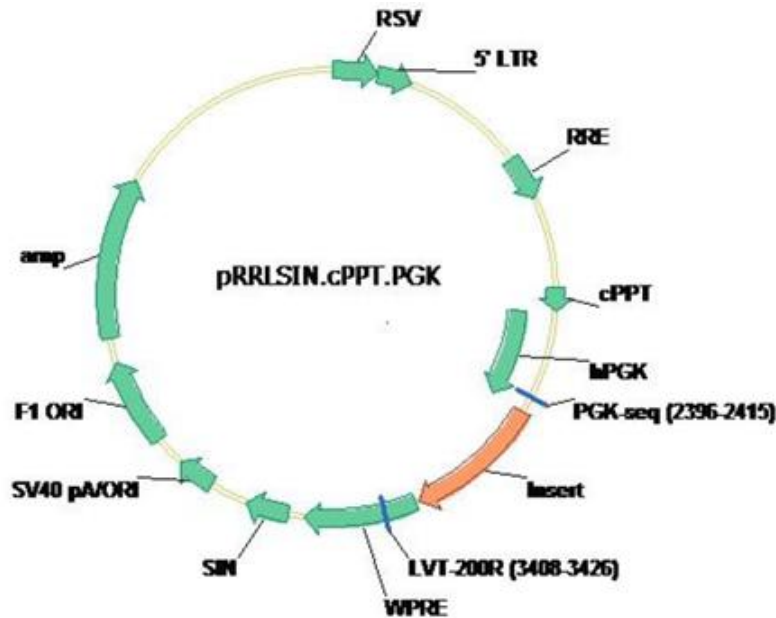

**Supplementary Figure S2A-C.** Results of primers validation. Two clearly distinguishable clusters of positive and negative droplets for Actb (A), Mstn (B), Tert (C); copy number of Mstn gene in relation to Actin B in 4T1luc2 and daughter clones (D).

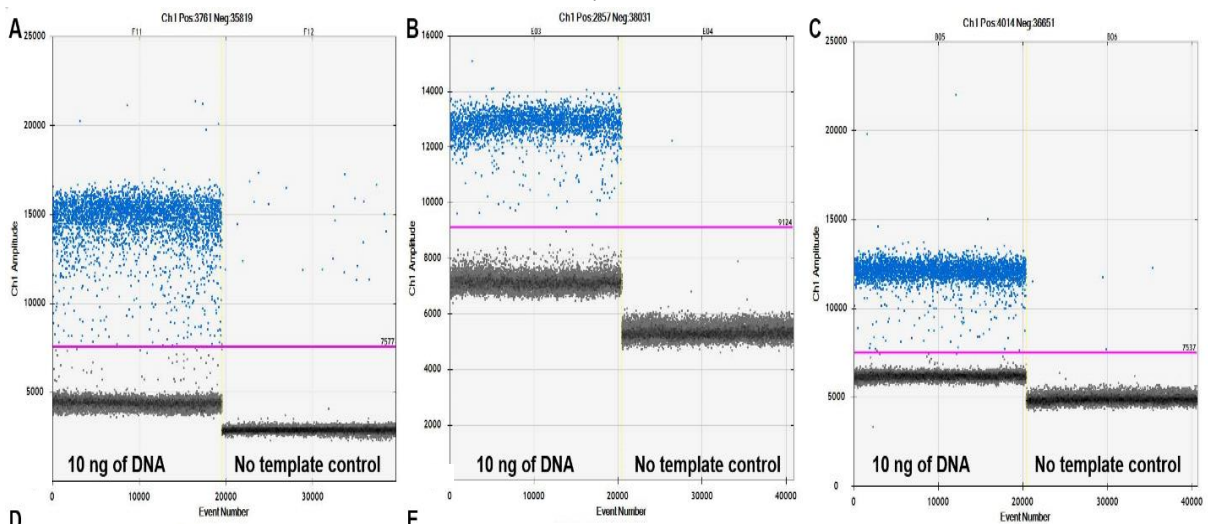

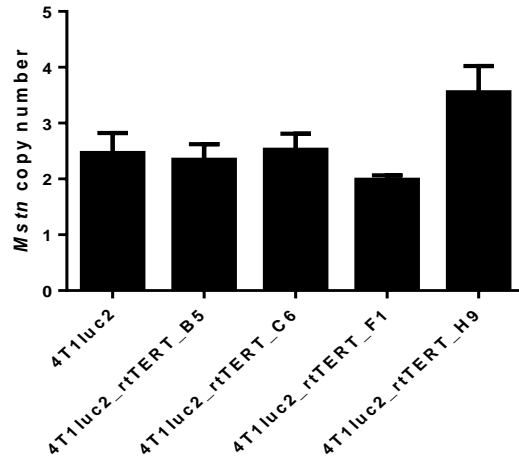

D

**Supplementary Figure S3.** Gating of live and single cells. Green – G1/G0 phase, yellow – S phase, turquoise – G2/M phase.

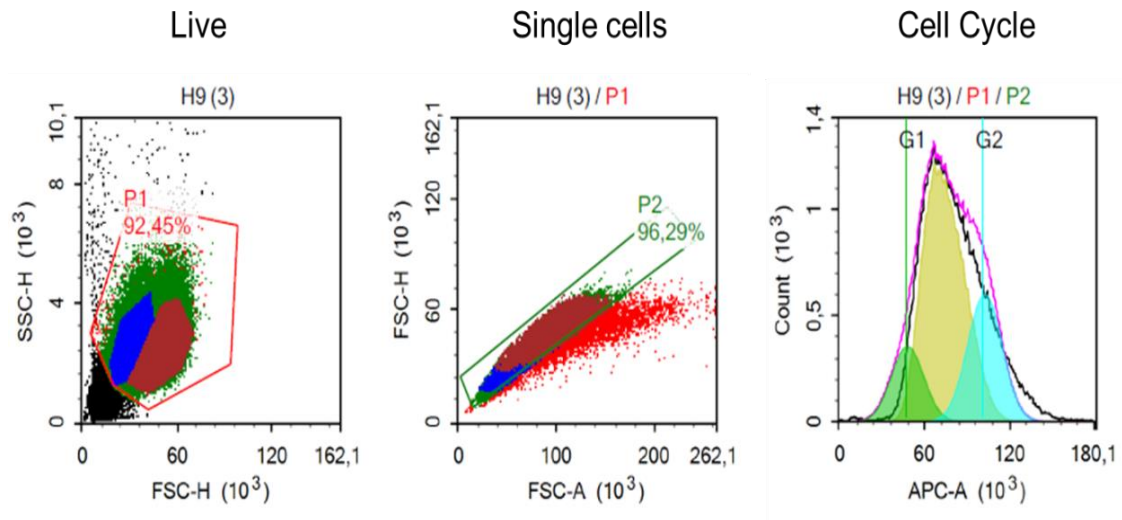

**Supplementary Figure S4.** Histograms of cells in different cell cycle phases. Green – G1/G0, yellow – S, turquoise – G2/M. Three replicates for each cell line.

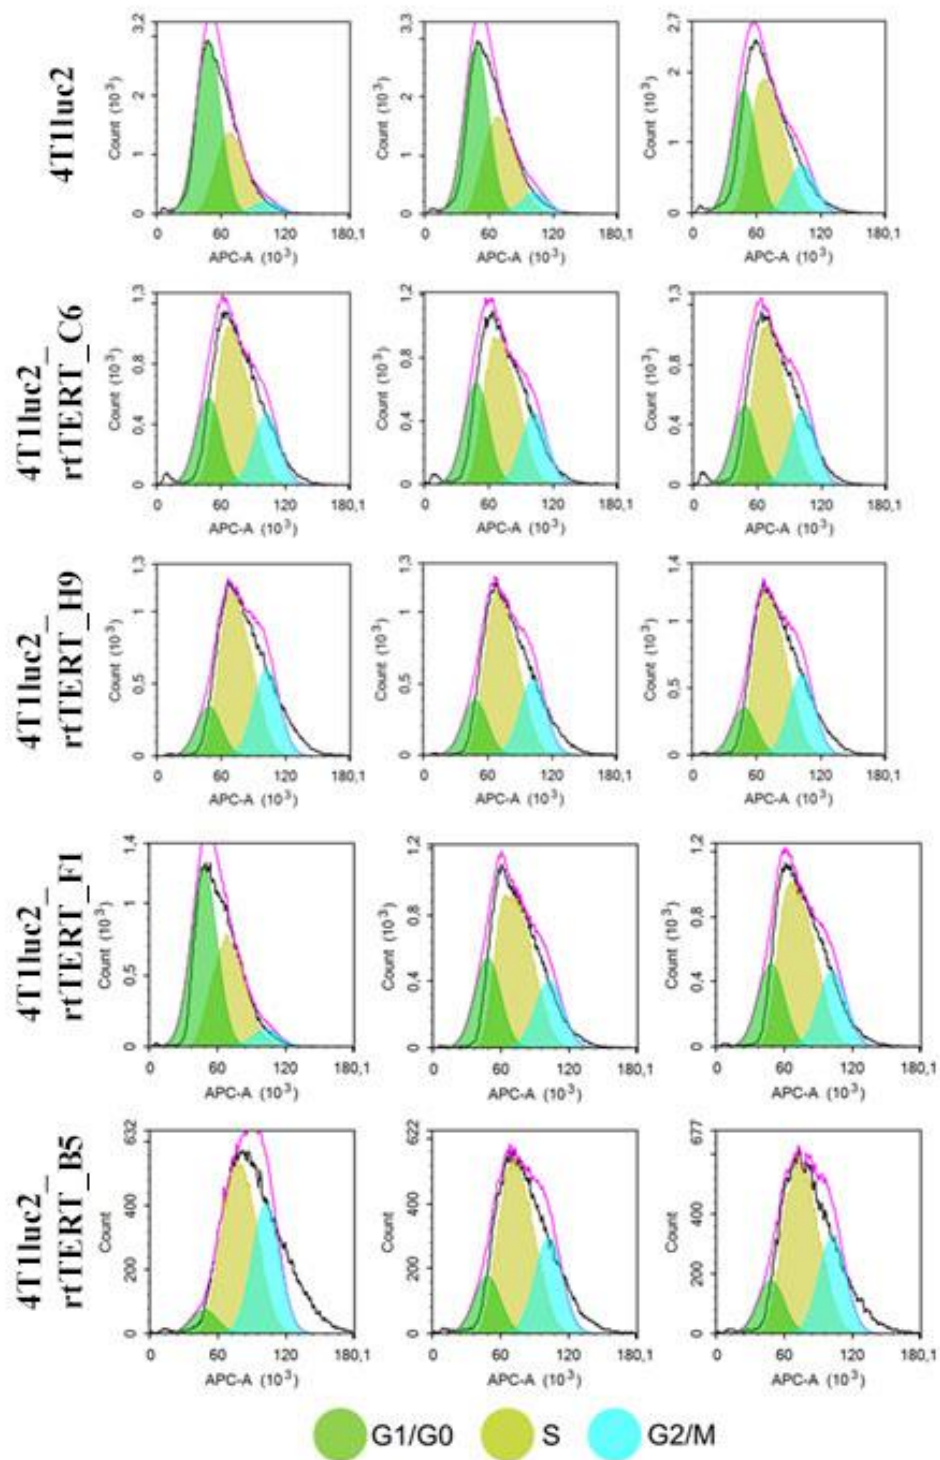

**Supplementary Figure S5.** The example of the multiparametric flow cytometry analysis of the splenocytes stimulated by the incubation in the presence of peptide TERT8 inducing activation of both helpers and cytotoxic T-lymphocytes. The size of IFN- $\gamma$ , double IFN- $\gamma$ /IL-2 and triple IFN- $\gamma$ /IL-2 /TNF- $\alpha$ -expressing cells populations are shown as proportion of respective cytokine-producing CD4+ or CD8+ cells.

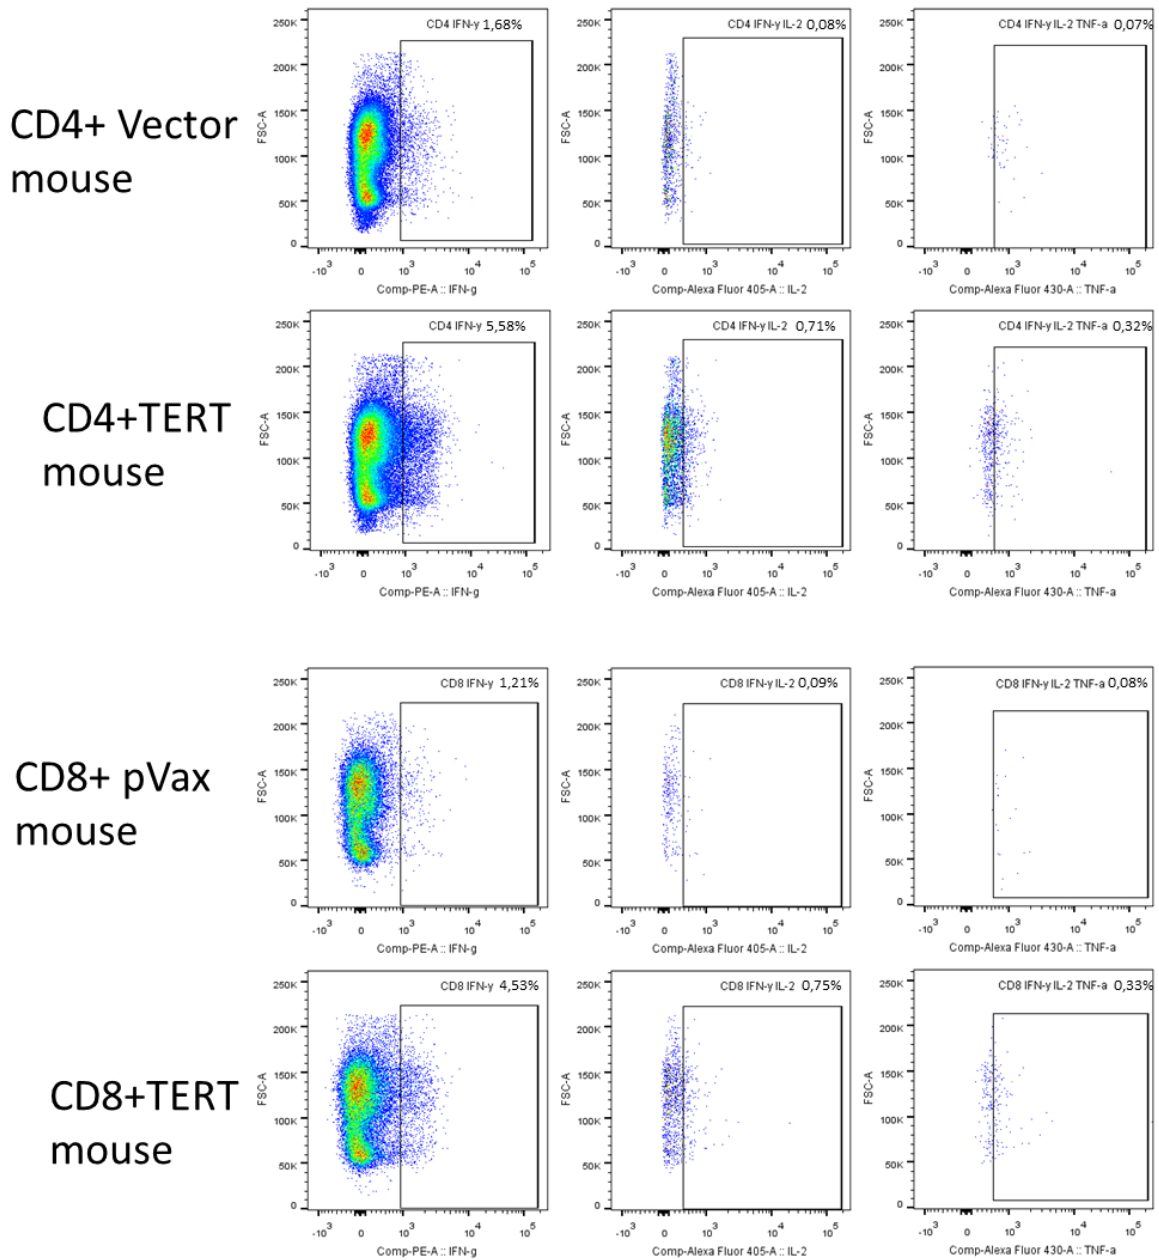

**Supplementary Figure S6.** Expression of rat TERT in 293T cells transiently transfected with rat TERT-encoding plasmids. Western blotting of the lysates of 293T cells transfected with vector pVAX1 (lane 1), pVax-TERT (lane 2), and pVax-TERT-HA (lane 3). Blots were stained with commercial rabbit polyclonal anti-TERT antibodies raised against synthetic peptide (**A**), and re-stained with monoclonal anti-actin antibodies (**B**). Positions of molecular mass markers are given to the right in kDa.

**A**

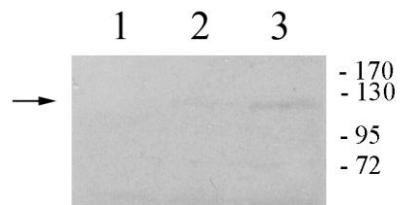

**B**

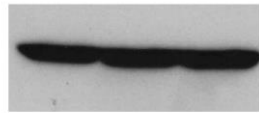

**Supplementary Figure S7.** Immune recognition of TERT-derived peptides (Table 1) by CD4+ and CD8+ T cells of mice DNA-immunized with TERT or TERT-HA compared to vector-immunized mice analyzed by multiparametric flow cytometry. Percent of CD4+ (A) and CD8+ (B) T cells reacting to stimulation with TERT peptides by single cytokine expression. Values represent mean±SD. Difference between TERT, TERT-HA DNA-immunized and control vector-immunized mice was analyzed by Mann-Whitney test. Difference between TERT, TERT-HA DNA-immunized and control vector \*-  $p < 0.05$ ; \*\* -  $p < 0.01$ . No difference between TERT and TERT-HA DNA-immunized mice was found, all  $p > 0.05$ .

**A**

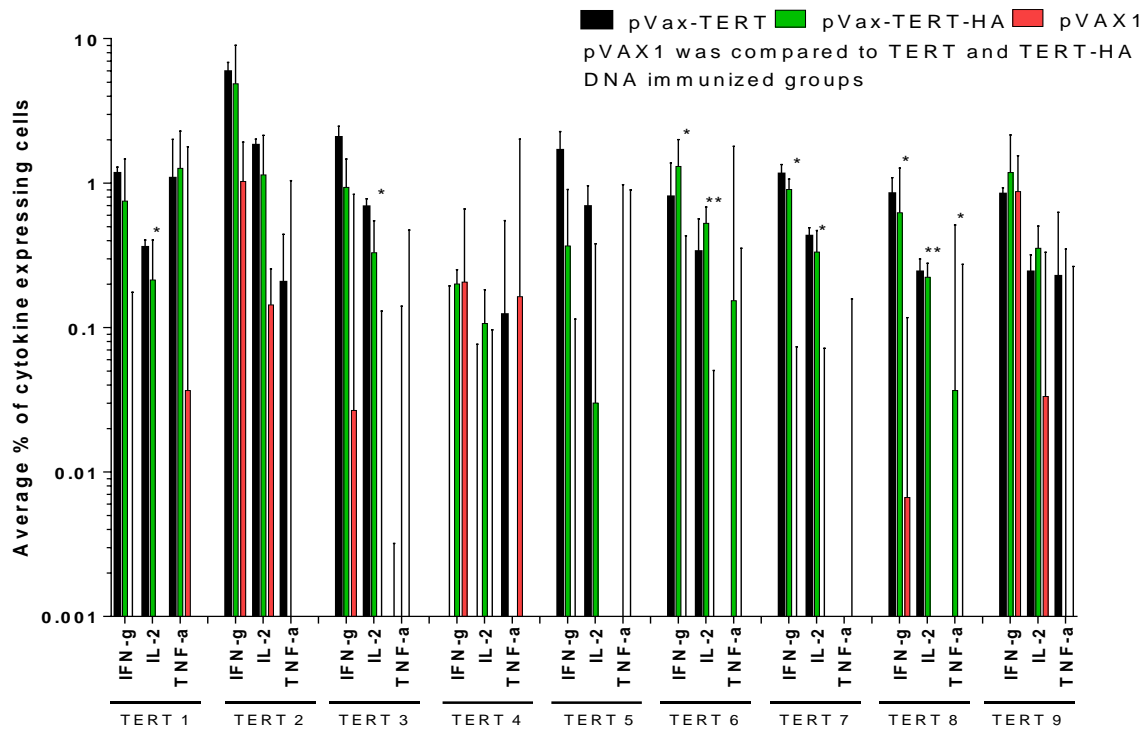

**B**

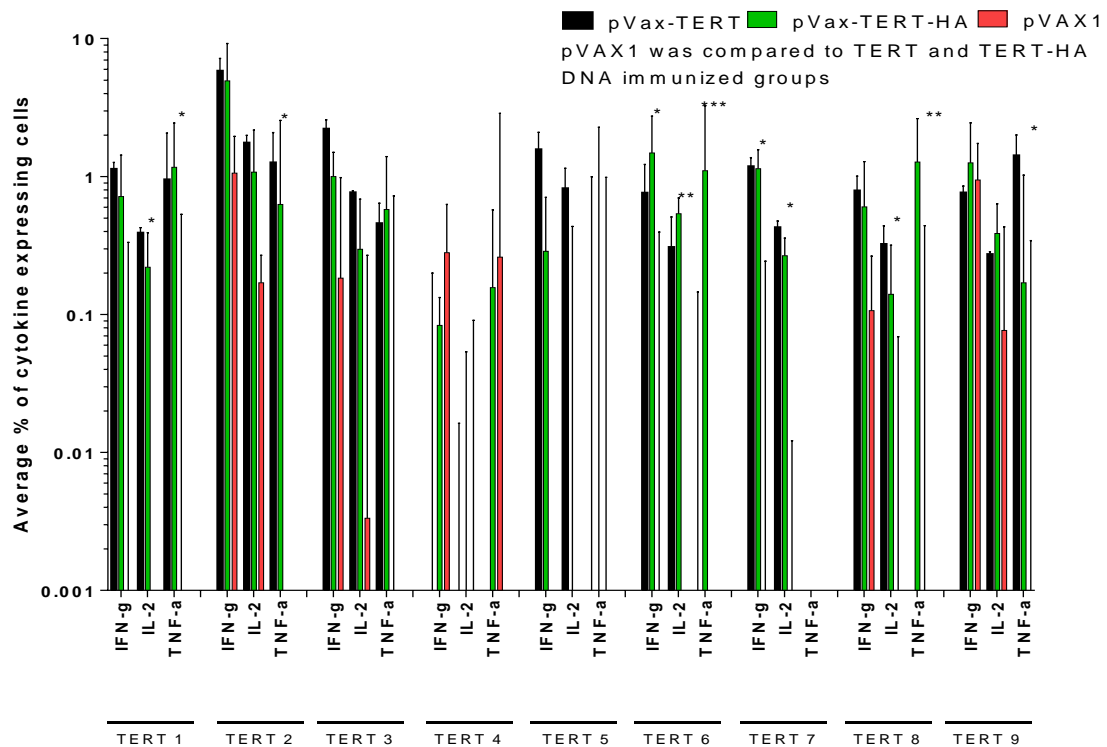

**Supplementary Figure S8.** Correlates of the number of metastases in liver of mice implanted with 4T1luc2 cells expressing rtTERT. Average number of liver metastases correlates with max radiance from liver in *ex vivo* organ imaging ( $R = 0.5$ ;  $p = 0.024$ ) (A); average number of liver metastases and their size correlates to the number of liver-infiltrating leukocytes ( $R = 0.83$ ,  $p < 10^{-4}$ ) (B).

A

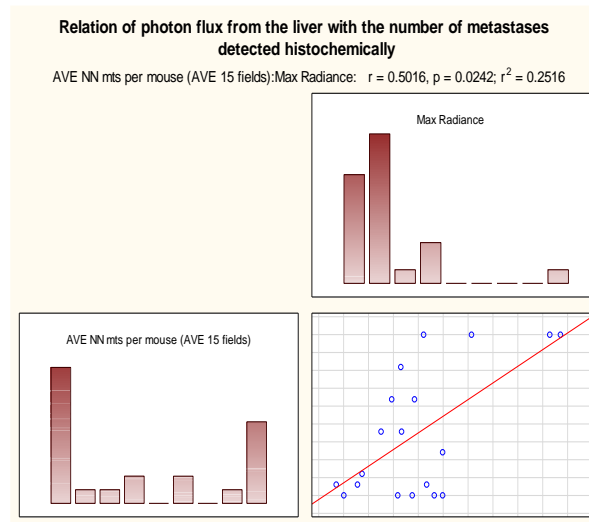

B

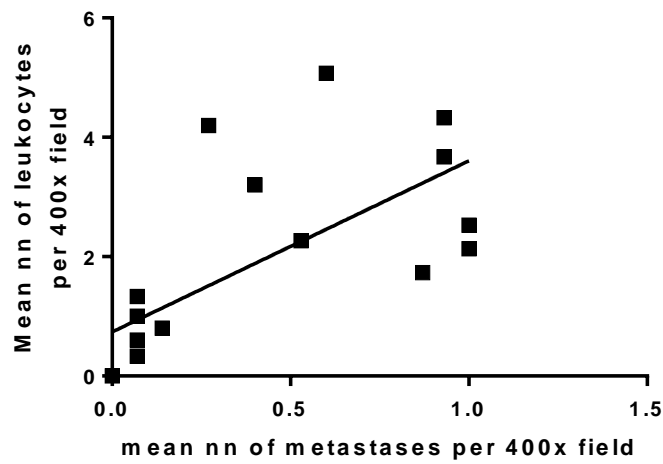

**Supplementary Figure S9.** Comparison of the overall profile of *in vitro* cytokine response of CD4+ (A, C, E) and CD8+ (B, D, F) T cells of mice implanted with rtTERT expressing cell lines 4T1luc2\_rtTERT\_H9 (H9; n = 4) and 4T1luc2\_rtTERT\_C6 (C6; n = 4) and parental cell line (4T1luc2; n = 4) to stimulation with TERT peptides: TERT2 presenting an autoepitope (A, B); TERT6 (C, D); and TERT8 (E, F). Cytokine production was assessed by multiparametric flow cytometry and presented as percent of mono-, di- and tri-cytokine producing CD4+ and CD8+ T cells. Statistical analysis was performed by Friedman ANOVA test and Kendall Coefficient of concordance (Statistica AXA 11.0). Criteria of statistically significant difference were set at  $p < 0.01$ .

**A**

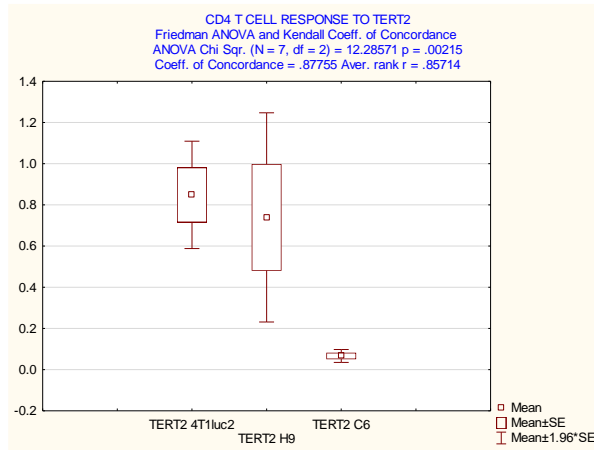

**B**

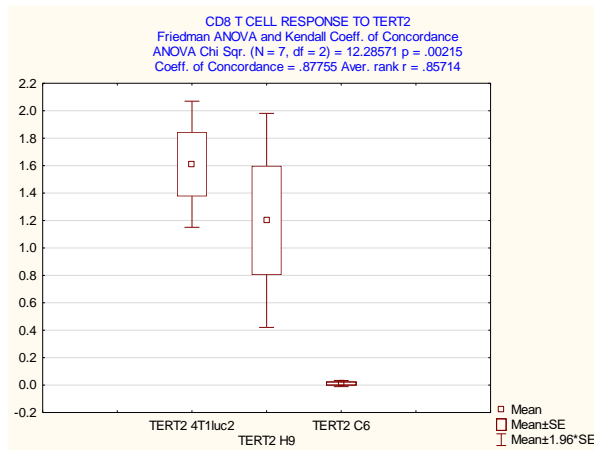

**C**

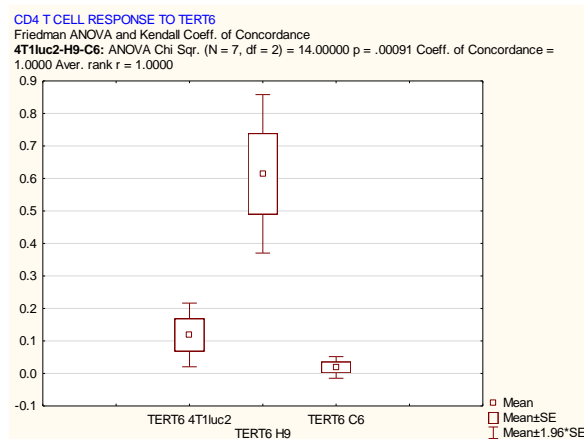



D

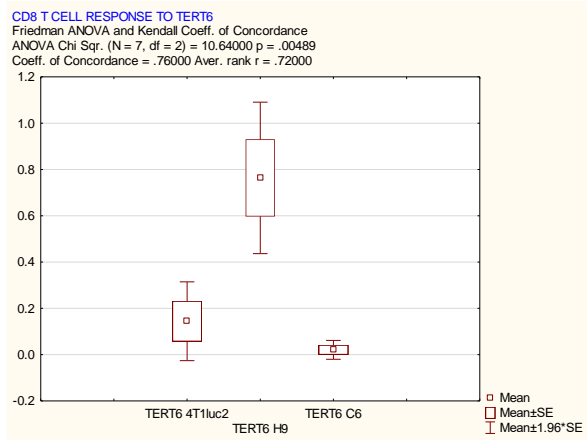

E

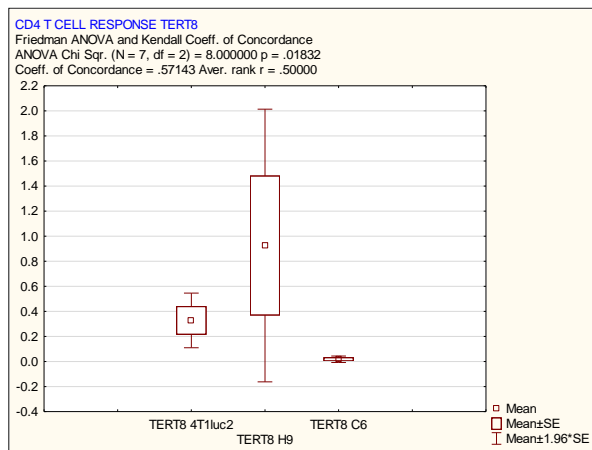

F

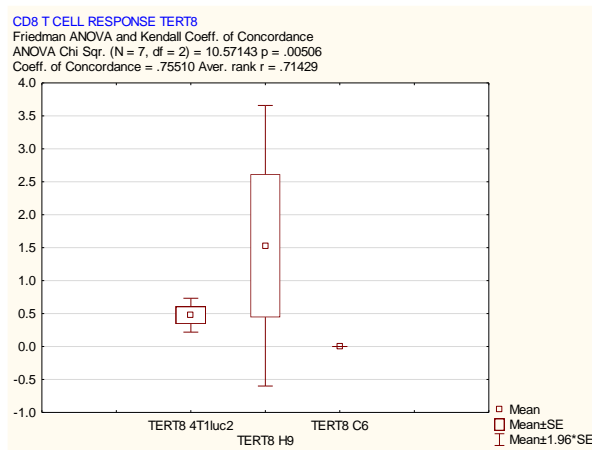

**Supplementary Figure S10.** Overall profile of in vitro cytokine response of CD4+ (A) and CD8+ (B) T cells of mice implanted with rtTERT expressing cell lines 4T1luc2\_rtTERT\_H9 (H9; n = 4) and 4T1luc2\_rtTERT\_C6 (C6; n = 4) and parental cell line (4T1luc2; n = 4) to stimulation with mitogen PMA. Cytokine production was assessed by multiparametric flow cytometry and presented as percent of mono-, di- and tri-cytokine-producing CD4+ and CD8+ T cells. Statistical analysis of the profile for CD4+ (C) and CD8+ T cells (D) was performed by Friedman ANOVA test and Kendall Coefficient of concordance (Statistica AXA 10.0);  $p < 0.01$  was considered as significant.

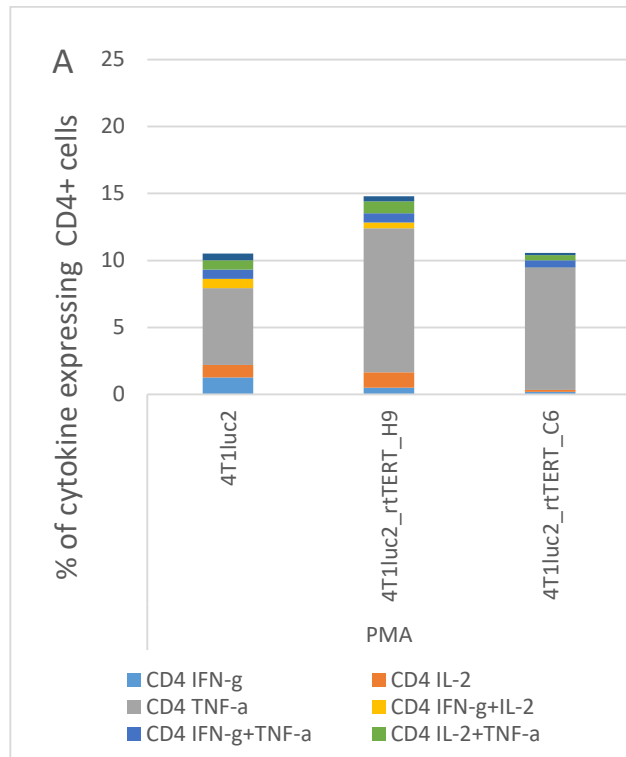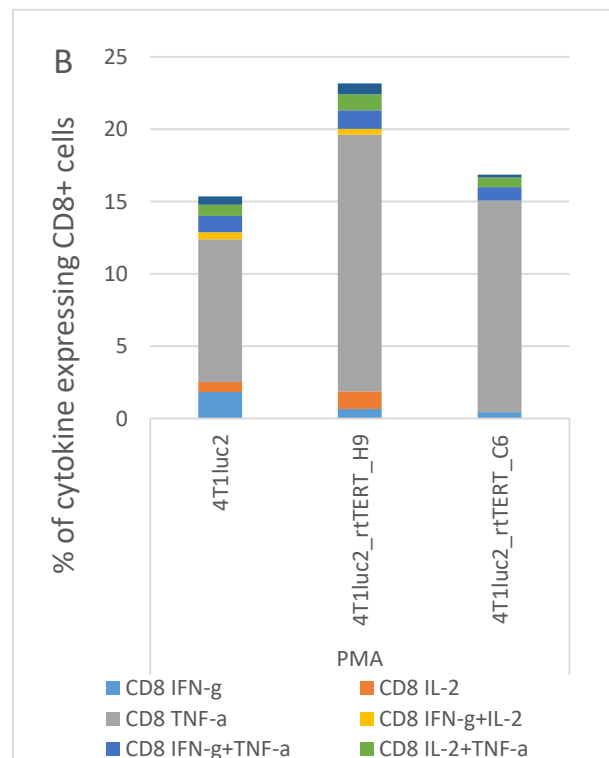

C

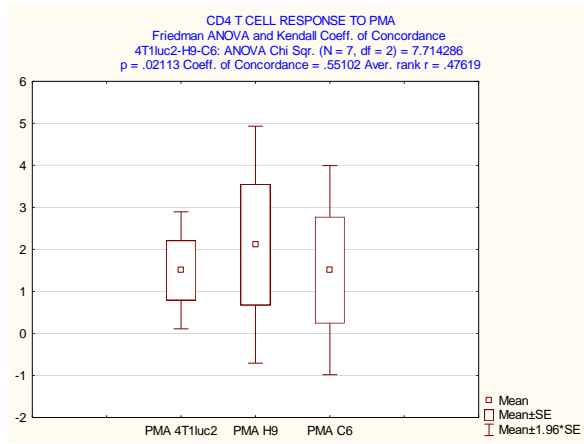

D

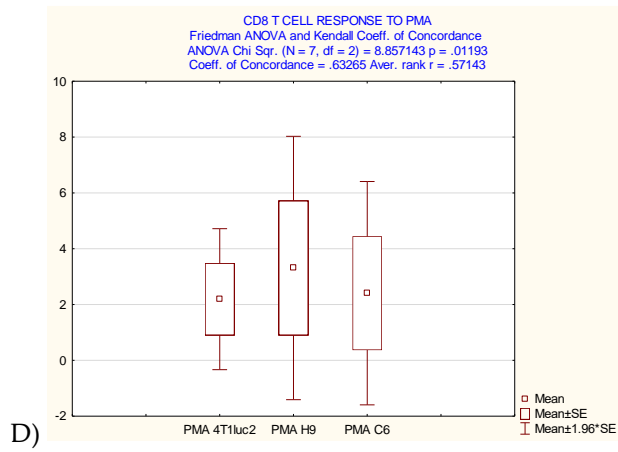

**Supplementary Figure S11.** Features of anti-TERT immune response promoting and restricting tumor growth. Percent of IFN-g/IL-2 secreting CD4+ (A, C) and CD8+ (B, D) T cells specific to TERT 2 (A, B) and TERT1, TERT6 and TERT8 (TERT168, summed) (C, D) in mice with aggressively growing tumors (n = 4), non aggressive tumors (restricted tumor growth, n = 4) and no tumors (rejected tumors or tumors <10 mm<sup>3</sup>, n = 4); Correlation of the tumor size (mm<sup>2</sup>) by experimental end-point to the percent of TERT2- specific CD4 (E) and CD8 (F) T cells secreting one, two or three cytokines; Correlation of tumor growth as photon fluz from tumor implantation site by day 16 to percent of TNF-a secreting CD4+ positive T cells specific to TERT2 (G, n = 8). Multiple comparisons are done using Kruskall Wallis, and pair-wise, using Mann Whitney test; correlations, using Spearman ranking test (Statistica Axa 11), all *p* values <0.05 are considered as significant, and *p* < 0.1 as tendency to a difference.

A

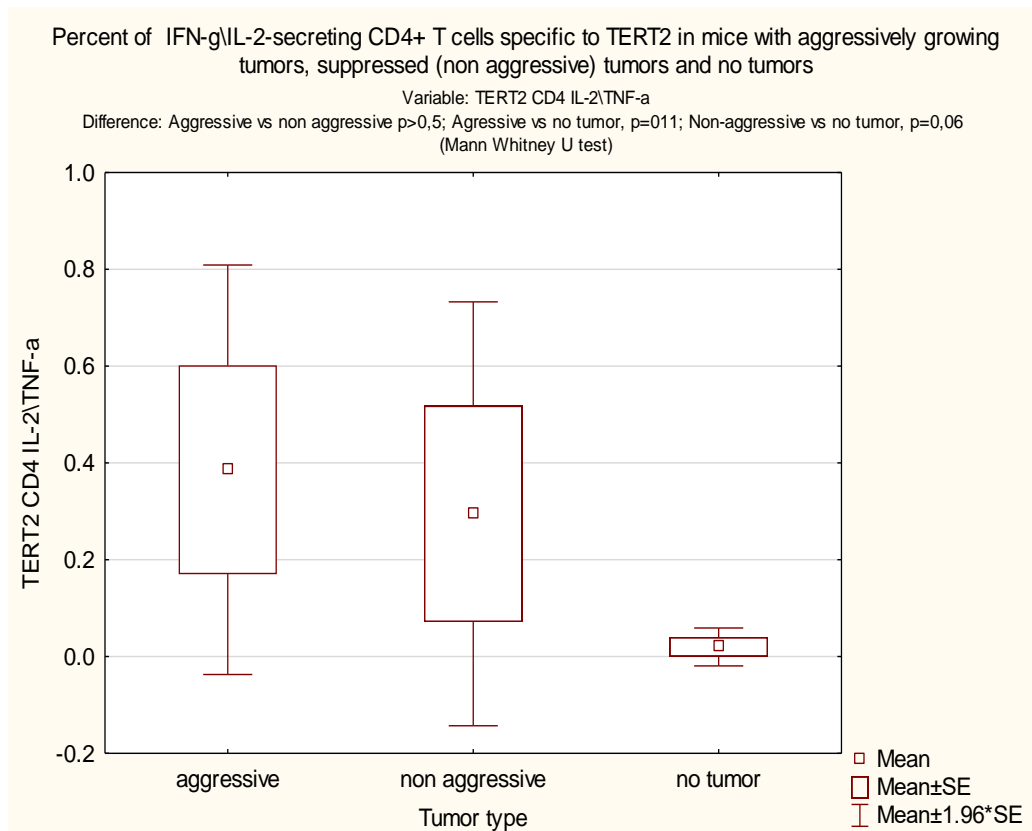

B

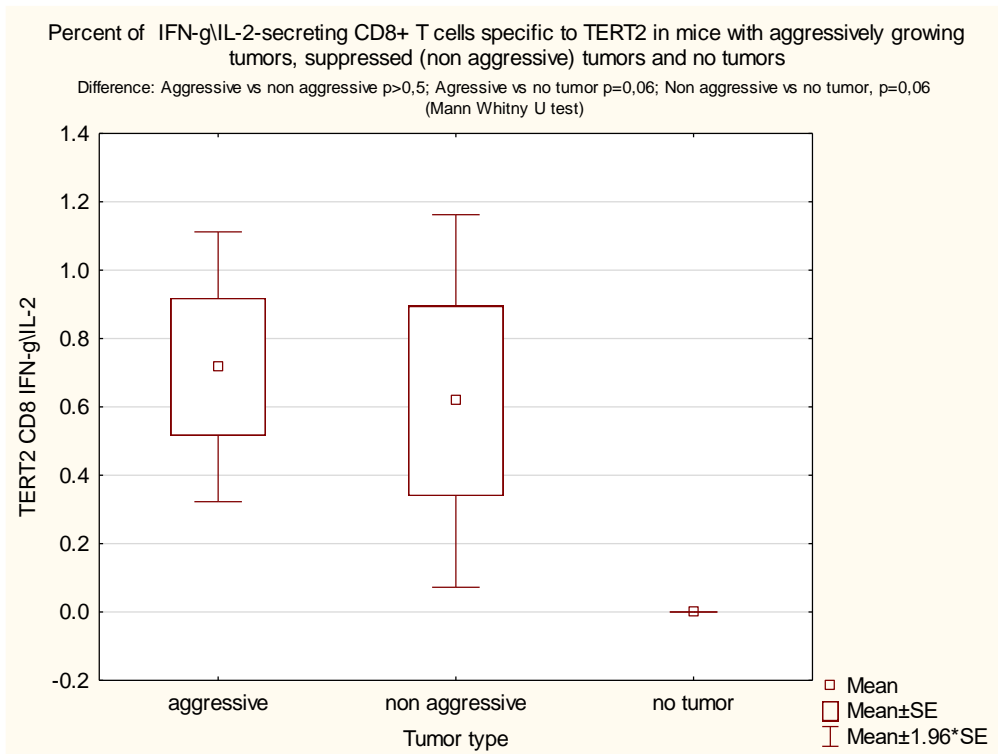

C

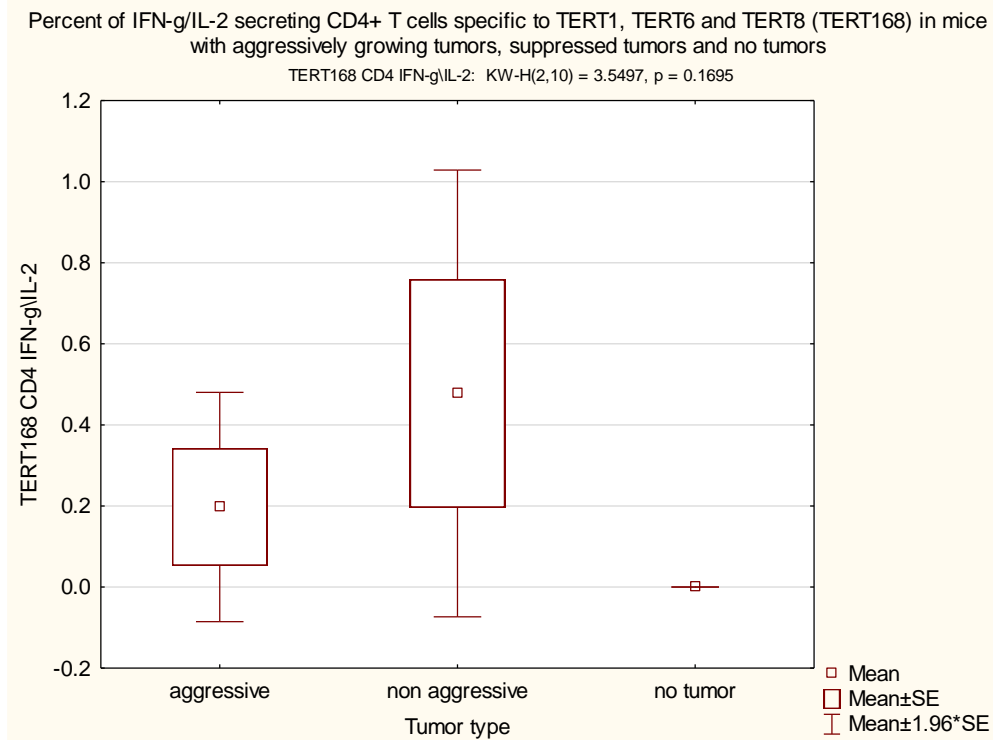

D

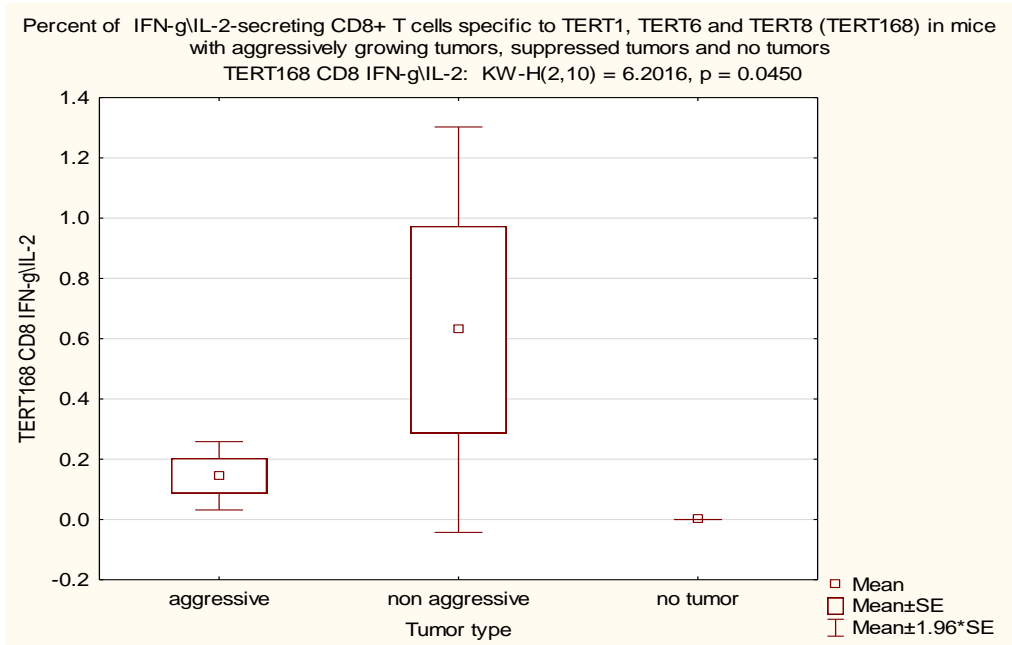

E

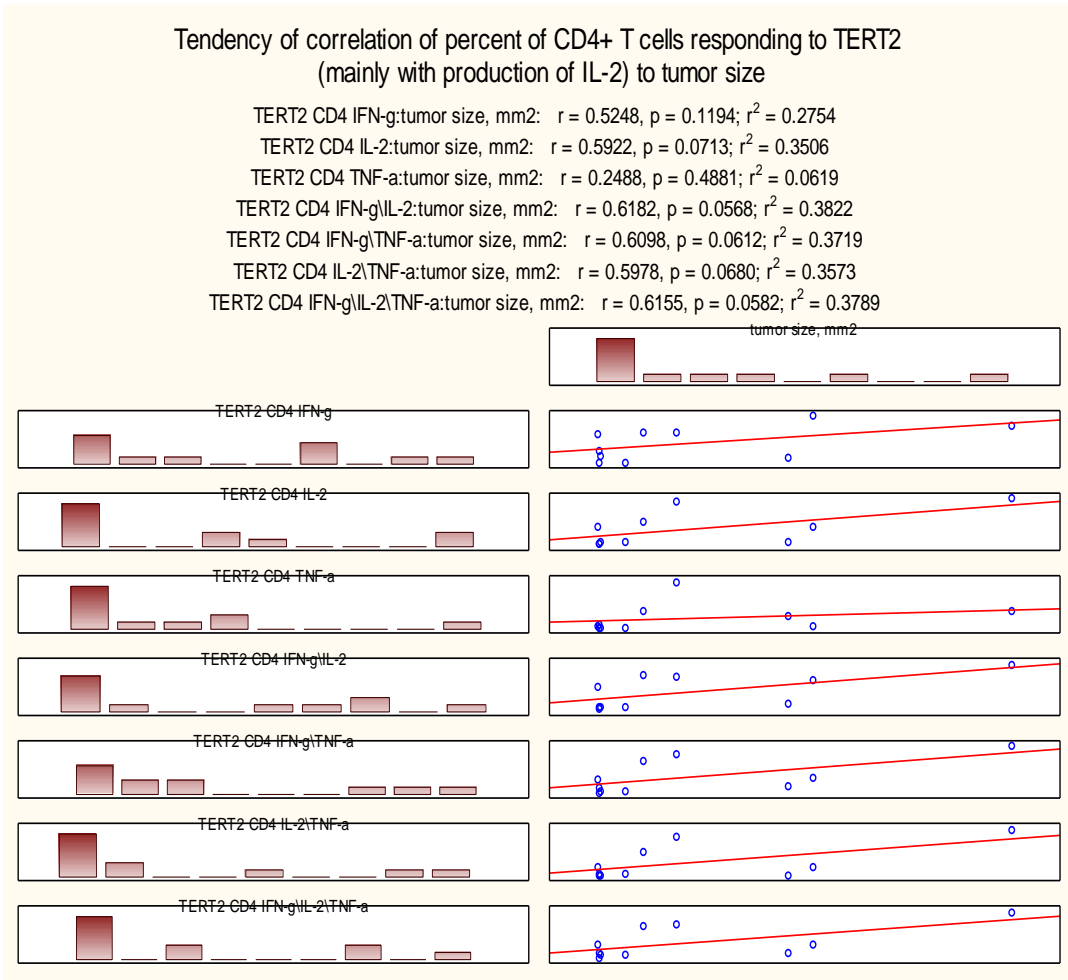

F

No correlation of percent of CD8+ T cells responding to TERT2 to tumor size

TERT2 CD8 IFN-g:tumor size, mm2:  $r = 0.0440$ ,  $p = 0.8978$ ;  $r^2 = 0.0019$   
 TERT2 CD8 IL-2:tumor size, mm2:  $r = 0.2530$ ,  $p = 0.4530$ ;  $r^2 = 0.0640$   
 TERT2 CD8 TNF-a:tumor size, mm2:  $r = 0.1077$ ,  $p = 0.7526$ ;  $r^2 = 0.0116$   
 TERT2 CD8 IFN-g\IL-2:tumor size, mm2:  $r = 0.3167$ ,  $p = 0.3427$ ;  $r^2 = 0.1003$   
 TERT2 CD8 IFN-g\TNF-a:tumor size, mm2:  $r = 0.2076$ ,  $p = 0.5402$ ;  $r^2 = 0.0431$   
 TERT2 CD8 IL-2\TNF-a:tumor size, mm2:  $r = 0.1832$ ,  $p = 0.5897$ ;  $r^2 = 0.0336$   
 TERT2 CD8 IFN-g\IL-2\TNF-a:tumor size, mm2:  $r = 0.2241$ ,  $p = 0.5076$ ;  $r^2 = 0.0502$

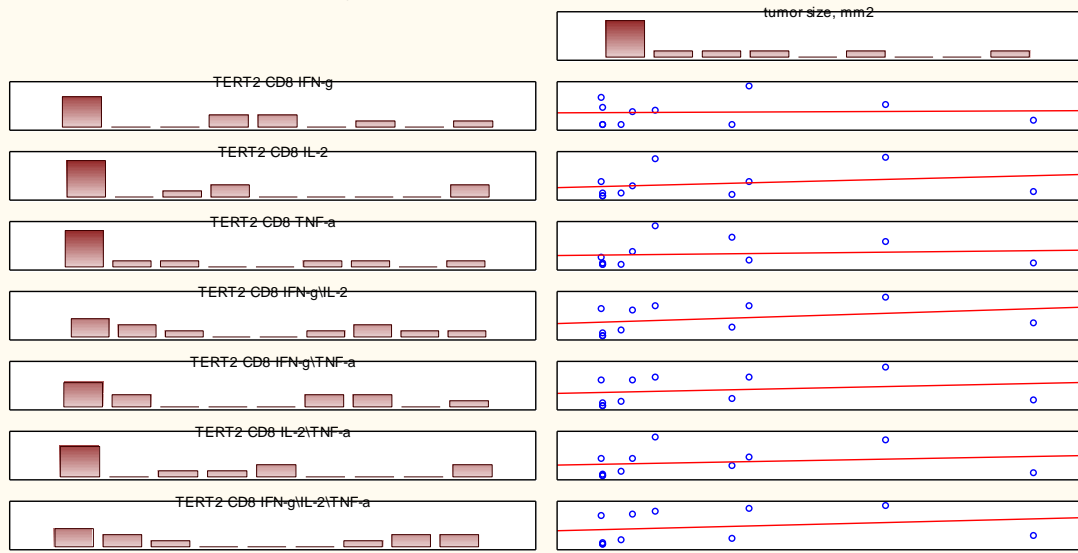

G

Correlation of tumor growth (bu photon flux) to percent of TNF-a secreting CD4+ T cells specific to TERT2

TERT2 CD4 TNF-a:total flux, d16:  $r = 0.7122$ ,  $p = 0.0475$ ;  $r^2 = 0.5073$   
 TERT2 CD4 IFN-g\TNF-a:total flux, d16:  $r = 0.6686$ ,  $p = 0.0699$ ;  $r^2 = 0.4470$   
 TERT2 CD4 IFN-g\IL-2\TNF-a:total flux, d16:  $r = 0.6449$ ,  $p = 0.0843$ ;  $r^2 = 0.4158$

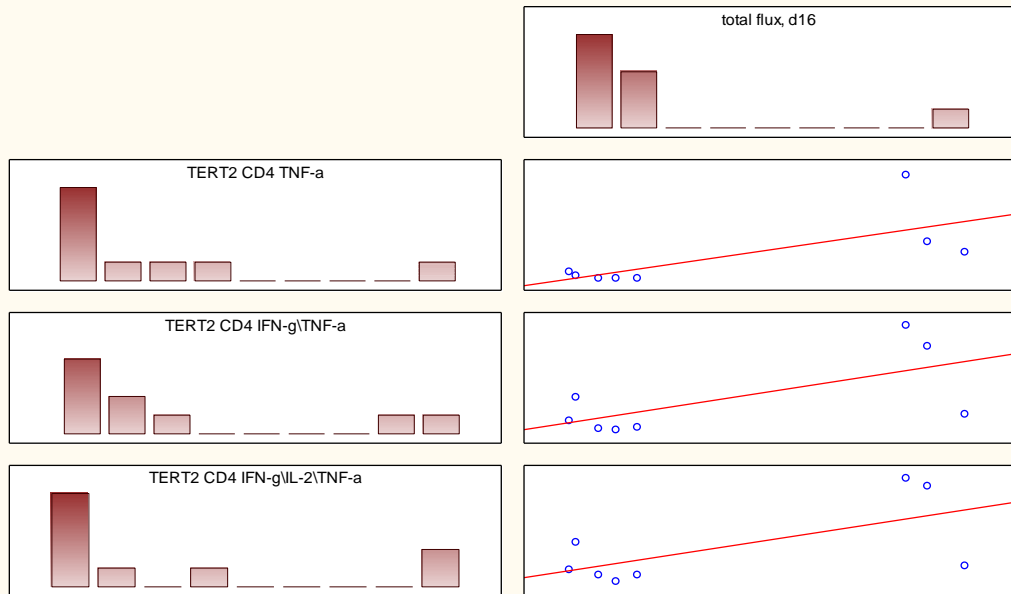

**Supplementary Table S1.** Primers used in PCR, RT-PCR and ddPCR assays.

| Primer | Target Sequence Codes For                | Direction | Sequence 5'to 3'           | Assay          |
|--------|------------------------------------------|-----------|----------------------------|----------------|
| TERT2  | rt domain of TERT                        | FW        | CTTTGGCGACATGGAGAACA       | ddPCR          |
|        |                                          | RV        | TTTGGCATGTGCAAGGTGAG       |                |
| b-act  | Beta actin                               | FW        | TTCACCTGCCCTGAGTGTTTC      | ddPCR          |
|        |                                          | RV        | TGAAGGTCTCAAACATGATCTGTAGA |                |
| Mstn   | Myostatine                               | FW        | AAGACAACCTTCTGCCAAGAGC     | ddPCR          |
|        |                                          | RV        | AATCTCCTTTCTCTGCTACTTACAT  |                |
| rtTERT | rt domain of TERT                        | FW        | AGAGCTTCAGGAGACAAGTG       | PCR,<br>RT-PCR |
|        |                                          | RV        | AGTCTCGTTCATGCTGATGG       |                |
| HPRT1  | hypoxanthine phosphoribosyltransferase 1 | FW        | GGCCAGACTTTGTTGGATTT       | PCR,<br>RT-PCR |
|        |                                          | RV        | CAGATTCAACTTGCGCTCAT       |                |

**Supplementary Table S2.** Thermal cycling protocol for ddPCR.

| Temperature, °C | Time, Minutes | Ramp, °C/sec | Number of Cycles |
|-----------------|---------------|--------------|------------------|
| 95              | 5             | 2            | 1                |
| 95              | 0.5           | 2            | 35               |
| 59              | 1             | 2            |                  |
| 4               | 5             | 2            | 1                |
| 90              | 5             | 2            | 1                |
| 12              | 1             | 1            | 1                |



**Supplementary Table S3.** Correlations between % of CD4+ and CD8+ T cells of TERT/TERT\_HA DNA-immunized mice capable to respond to *in vitro* stimulation with peptides derived from aa of TERT (TERT5 - TERT8; Table 1) by secretion of multiple cytokines, and capacity of respective mice to clear cells co-expressing TERT/TERT-HA and Luc assessed by *in vivo* imaging (BLI) in antigen challenge (see Materials and Methods for description). BLI data represent loss of the photon flux from the site of booster injection with TERT/TERT-HA and Luc DNA on days 7, 9 and 12 (d7, d9, d12) compared to day 1 (d1) after the boost, in %. Table shows Spearman correlation coefficients R, significant correlations ( $p < 0.05$  and  $p < 0.01$ ) are depicted in red.

| Variable                          | Spearman Rank Order Correlations, $p < 0.05$ |                  |                  | Spearman Rank Order Correlations, $p < 0.01$ |                  |                  |
|-----------------------------------|----------------------------------------------|------------------|------------------|----------------------------------------------|------------------|------------------|
|                                   | BLI, % d7                                    | BLI, % d9        | BLI, % d12       | BLI, % d7                                    | BLI, % d9        | BLI, % d12       |
| CD4 IFN-g IL-2 TERT1              | -0.351445                                    | -0.371285        | -0.382622        | -0.351445                                    | -0.371285        | -0.382622        |
| CD4 IFN-g TNF-a TERT1             | -0.526725                                    | -0.538301        | -0.601971        | -0.526725                                    | -0.538301        | -0.601971        |
| CD4 IFN-g IL-2 TNF-a TERT1        | -0.499570                                    | -0.526493        | -0.562390        | -0.499570                                    | -0.526493        | -0.562390        |
| CD8 IFN-g IL-2 TERT1              | -0.362782                                    | -0.393959        | -0.427970        | -0.362782                                    | -0.393959        | -0.427970        |
| CD8 IFN-g TNF-a TERT1             | -0.560312                                    | -0.611250        | -0.677169        | -0.560312                                    | -0.611250        | -0.677169        |
| CD8 IFN-g IL-2 TNF-a TERT1        | -0.571365                                    | -0.622219        | -0.694014        | -0.571365                                    | -0.622219        | -0.694014        |
| CD4 IFN-g IL-2 TERT5              | -0.517519                                    | -0.562390        | -0.634185        | -0.517519                                    | -0.562390        | -0.634185        |
| CD4 IFN-g TNF-a TERT5             | -0.382831                                    | -0.467556        | -0.580522        | -0.382831                                    | -0.467556        | -0.580522        |
| CD4 IFN-g IL-2 TNF-a TERT5        | -0.389107                                    | -0.480108        | -0.586798        | -0.389107                                    | -0.480108        | -0.586798        |
| CD8 IFN-g IL-2 TERT5              | -0.571365                                    | -0.622219        | -0.694014        | -0.571365                                    | -0.622219        | -0.694014        |
| CD8 IFN-g TNF-a TERT5             | -0.389107                                    | -0.480108        | -0.586798        | -0.389107                                    | -0.480108        | -0.586798        |
| CD8 IFN-g IL-2 TNF-a TERT5        | -0.389107                                    | -0.480108        | -0.586798        | -0.389107                                    | -0.480108        | -0.586798        |
| CD4 IFN-g IL-2 TERT6              | -0.491689                                    | -0.581087        | -0.561531        | -0.491689                                    | -0.581087        | -0.561531        |
| <b>CD4 IFN-g TNF-a TERT6</b>      | <b>-0.653723</b>                             | <b>-0.715184</b> | <b>-0.762677</b> | <b>-0.653723</b>                             | <b>-0.715184</b> | <b>-0.762677</b> |
| <b>CD4 IFN-g IL-2 TNF-a TERT6</b> | <b>-0.653723</b>                             | <b>-0.720772</b> | <b>-0.779439</b> | <b>-0.653723</b>                             | <b>-0.720772</b> | <b>-0.779439</b> |
| CD8 IFN-g IL-2 TERT6              | -0.491689                                    | -0.581087        | -0.561531        | -0.491689                                    | -0.581087        | -0.561531        |
| <b>CD8 IFN-g TNF-a TERT6</b>      | <b>-0.581087</b>                             | <b>-0.681660</b> | <b>-0.706803</b> | <b>-0.581087</b>                             | <b>-0.681660</b> | <b>-0.706803</b> |
| <b>CD8 IFN-g IL-2 TNF-a TERT6</b> | <b>-0.653723</b>                             | <b>-0.715184</b> | <b>-0.762677</b> | <b>-0.653723</b>                             | <b>-0.715184</b> | <b>-0.762677</b> |
| CD4 IFN-g IL-2 TERT7              | -0.459146                                    | -0.555511        | -0.510163        | -0.459146                                    | -0.555511        | -0.510163        |
| CD4 IFN-g TNF-a TERT7             | -0.549842                                    | -0.634869        | -0.685885        | -0.549842                                    | -0.634869        | -0.685885        |
| <b>CD4 IFN-g IL-2 TNF-a TERT7</b> | <b>-0.595190</b>                             | <b>-0.680217</b> | <b>-0.719896</b> | <b>-0.595190</b>                             | <b>-0.680217</b> | <b>-0.719896</b> |
| CD8 IFN-g IL-2 TERT7              | -0.481820                                    | -0.578184        | -0.544174        | -0.481820                                    | -0.578184        | -0.544174        |
| CD8 IFN-g TNF-a TERT7             | -0.463267                                    | -0.568681        | -0.491008        | -0.463267                                    | -0.568681        | -0.491008        |
| CD8 IFN-g IL-2 TNF-a TERT7        | -0.527168                                    | -0.623532        | -0.578184        | -0.527168                                    | -0.623532        | -0.578184        |
| CD4 IFN-g IL-2 TERT8              | -0.519345                                    | -0.613269        | -0.599457        | -0.519345                                    | -0.613269        | -0.599457        |
| <b>CD4 IFN-g TNF-a TERT8</b>      | <b>-0.731327</b>                             | <b>-0.759029</b> | <b>-0.814433</b> | <b>-0.731327</b>                             | <b>-0.759029</b> | <b>-0.814433</b> |
| <b>CD4 IFN-g IL-2 TNF-a TERT8</b> | <b>-0.597849</b>                             | <b>-0.681660</b> | <b>-0.740327</b> | <b>-0.597849</b>                             | <b>-0.681660</b> | <b>-0.740327</b> |
| CD8 IFN-g IL-2 TERT8              | -0.488280                                    | -0.593109        | -0.609660        | -0.488280                                    | -0.593109        | -0.609660        |
| CD8 IFN-g TNF-a TERT8             | -0.548970                                    | -0.637247        | -0.598626        | -0.548970                                    | -0.637247        | -0.598626        |
| <b>CD8 IFN-g IL-2 TNF-a TERT8</b> | <b>-0.720006</b>                             | <b>-0.775179</b> | <b>-0.841387</b> | <b>-0.720006</b>                             | <b>-0.775179</b> | <b>-0.841387</b> |

**Supplemental Table S4.** Comparison of the profiles of in vitro cytokine production by CD4+ and CD8+ T cells of mice implanted with rtTERT expressing cell lines 4T1luc2\_rtTERT\_H9 (H9; n = 4) and 4T1luc2\_rtTERT\_C6 (C6; n = 4) and parental cell line (4T1luc2; n = 4) to stimulation with TERT2 presenting an autoepitope; TERT6, 8 and co-stimulation with TERT6 and TERT8. Cytokine production was assessed by multiparametric flow cytometry and presented as percent of mono-, di- and tri-cytokine-producing CD4+ and CD8+ T cells. Statistical analysis of integral profile of cytokine production was performed by Friedman ANOVA test and Kendall Coefficient of concordance (Statistica AXA 10.0),  $p < 0.01$  was considered as significant.

|                                    | Profile of cytokine production of CD4+ and CD8+ T cells to stimulation with |               |               |               |               |              |
|------------------------------------|-----------------------------------------------------------------------------|---------------|---------------|---------------|---------------|--------------|
|                                    | TERT derived peptides                                                       |               |               |               |               | PMA          |
|                                    | TERT2                                                                       | TERT1         | TERT6         | TERT8         | TERT6+8       |              |
| CD4 T cells                        |                                                                             |               |               |               |               |              |
| ANOVA Chi Sqr                      | <b>12,286</b>                                                               | <b>7,76</b>   | <b>14</b>     | <b>8</b>      | <b>14</b>     | <b>7,714</b> |
| Kendall Coefficient of Concordance | <b>0,877</b>                                                                | <b>0,554</b>  | <b>1</b>      | <b>0,571</b>  | <b>1</b>      | <b>0,551</b> |
| Average rank                       | <b>0,85</b>                                                                 | <b>0,48</b>   | <b>1</b>      | <b>0,5</b>    | <b>1</b>      | <b>0,476</b> |
| p value                            | <b>0,002</b>                                                                | <b>0,02</b>   | <b>0,0009</b> | <b>0,018</b>  | <b>0,0009</b> | <b>0,02</b>  |
| CD8 T cells                        |                                                                             |               |               |               |               |              |
| ANOVA Chi Sqr                      | <b>12,286</b>                                                               | <b>10,571</b> | <b>10,64</b>  | <b>10,571</b> | <b>11,629</b> | <b>8,857</b> |
| Kendall Coefficient of Concordance | <b>0,877</b>                                                                | <b>0,755</b>  | <b>0,76</b>   | <b>0,755</b>  | <b>0,83</b>   | <b>0,632</b> |
| Average rank                       | <b>0,857</b>                                                                | <b>0,714</b>  | <b>0,72</b>   | <b>0,714</b>  | <b>0,802</b>  | <b>0,571</b> |
| p value                            | <b>0,002</b>                                                                | <b>0,005</b>  | <b>0,0049</b> | <b>0,005</b>  | <b>0,003</b>  | <b>0,012</b> |

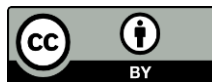

© 2020 by the authors. Submitted for possible open access publication under the terms and conditions of the Creative Commons Attribution (CC BY) license (<http://creativecommons.org/licenses/by/4.0/>).
